# Supplementary material for: A New Species of Eagle Ray Aetobatus narutobiei from the Northwest Pacific: An Example of the Critical Role Taxonomy Plays in Fisheries and Ecological Sciences
Source: PLoS One. 2013 Dec 31;8(12):e83785. doi: 10.1371/journal.pone.0083785 (PMC3877081; doi:10.1371/journal.pone.0083785)
Supplement: Table S1 — Morphometric data for Aetobatus narutobiei. Morphometric data for the holotype (FFNU-P-2001) with ranges for the 17 paratypes. Measurements expressed as a percentage of disc width. (XLSX) [file pone.0083785.s001.xlsx]

## Sheet: Sheet1
Table S1. Morphometric data for Aetobatus narutobiei Morphometric data for the holotype (FFNU-P-2001) with ranges for the 17 paratypes. Measurements expressed as a percentage of disc width.
	Holotype	Paratypes n=17
		Min.	Max.
Disc width (mm)	831	342	1210
Total length	189.771	194.132	257.224
Pre-dorsal length	64.6209	57.4987	67.1233
Disc, length	63.2972	58.1651	65.0062
Snout to pectoral-fin insertion	57.8821	52.4477	59.4022
Disc thickness	13.9591	11.4779	15.3598
Snout to pectoral-fin origin	16.5511	15.375	17.5174
Posterior orbit to pectoral-fin insertion	42.9603	41.178	46.5289
Snout to maximum width (horiz.)	41.3959	35.8183	42.4271
Pectoral-fin anterior margin	48.3755	46.5114	51.1771
Pectoral-fin posterior margin	49.3381	44.0306	50.6612
Pectoral-fin base length	42.1179	40.1506	44.9587
Pectoral-fin inner margin	5.15403	5.15864	7.43705
Head length (ventral)	31.1131	27.3817	31.9054
Preorbital length	11.5223	8.31818	11.7898
Preorbital length (horiz.)	9.5716	5.04826	9.42049
Head width at pectoral-fin origins	16.5427	15.5475	19.9786
Head height at pectoral-fin origins	9.49097	9.381	11.6799
Head width at mid-eye	14.0734	13.5816	15.8159
Head height at mid-eye	7.87244	7.0683	10.429
Interorbital width	8.80746	8.91325	10.8153
Interspiracular width	10.3273	9.94479	12.2301
Distance across spiracles	14.929	14.9936	17.4731
Spiracle length (longest)	5.13959	4.42403	7.79261
Spiracle width (narrowest)	2.19134	1.71937	3.25284
Orbit diameter	4.11312	3.64463	6.31287
Eye diameter	1.63177	1.36364	2.03753
Orbit and spiracle length	9.94946	9.99573	12.762
Preoral length	12.9495	9.79825	13.8271
Prenasal length	9.58604	7.1156	9.63607
Prenasal length (horiz.)	9.14922	6.54861	9.23906
Rostral lobe width	10.5114	9.21468	10.3785
Rostral lobe length	8.47774	4.75552	8.1302
Mouth width	6.09266	6.29496	8.0113
Width of upper jaw plate	4.83032	4.75218	5.76944
Width of lower jaw plate	3.79663	3.7971	4.52815
Internarial width (external)	4.77136	4.35072	5.34746
Nasal curtain length	5.21179	4.27706	5.41823
Nasal curtain width	6.34176	6.01978	8.05367
Depth of nasal curtain median notch	1.94103	1.1938	2.22661
Nostril length (internal)	2.74007	2.33512	3.75141
Width of first gill slit	1.94465	1.47473	2.2562
Width of third gill slit	2.11071	1.61978	2.22314
Width of fifth gill slit	1.62214	1.33854	1.97287
Distance from edge of disc to first gill slit	5.47052	5.09618	6.71046
Distance between first gill slits	16.3899	16.2292	17.876
Distance between fifth gill slits	10.2082	9.6735	10.8509
Tail at axil of pelvic fins (width)	3.35499	2.84404	3.88952
Tail at axil of pelvic fins (height)	4.07341	3.58177	4.55848
Tail at origin of stinging spine(s) (width)	1.41035	1.4876	2.32578
Tail at origin of stinging spine(s) (height)	2.05897	1.85486	2.89205
Pectoral-fin insertion to spine origin (horiz.)	13.4838	10.9432	14.719
Length of first stinging spine	9.86643	3.89451	12.6893
Length of second stinging spine	8.84116	5.15457	13.0257
Pectoral-fin insertion to dorsal-fin origin (horiz.)	8.45247	5.33041	8.30884
Dorsal-fin length	6.53309	5.28418	6.08264
Dorsal-fin anterior margin	5.81949	4.89041	5.91462
Dorsal-fin height	3.2852	2.2422	3.38843
Dorsal-fin posterior margin	3.05897	2.08807	3.18182
Dorsal-fin inner margin	1.54152	0.802326	1.60474
Snout to anterior cloaca	60.6498	50.8231	62.2665
Lower jaw to anterior cloaca	48.2551	40.0912	49.4396
Cloaca anterior to tail tip	129.122	133.967	198.173
Cloaca anterior to stinging spine	11.083	8.05966	15.0413
Width across pelvic fin bases	13.7304	12.0885	15.6612
Greatest span of pelvic fins	25.219	18.504	26.6942
Pelvic-fin length	17.1528	14.0597	18.843
Pelvic-fin anterior margin	15.1167	12.2301	16.0211
Pelvic-fin base	9.50181	7.28352	10.8182
Pelvic-fin posterior margin	9.04693	8.0429	10.2466
Pelvic-fin inner margin	10.3658	7.71376	12.0256
Clasper outer length	7.20578	6.1238	6.9
Clasper inner length	12.633	12.3811	13.0619
Clasper width at base	3.03129	2.47447	3.03129
